# Supplementary material for: Synthesis, Spectral Characterization, and Biochemical Evaluation of Antidiabetic Properties of a New Zinc-Diosmin Complex Studied in High Fat Diet Fed-Low Dose Streptozotocin Induced Experimental Type 2 Diabetes in Rats
Source: Hindawi journal article supplement (doi:10.1155/2015/350829), 2015-01-01
Supplement: f1 [file 350829.f1.pdf]

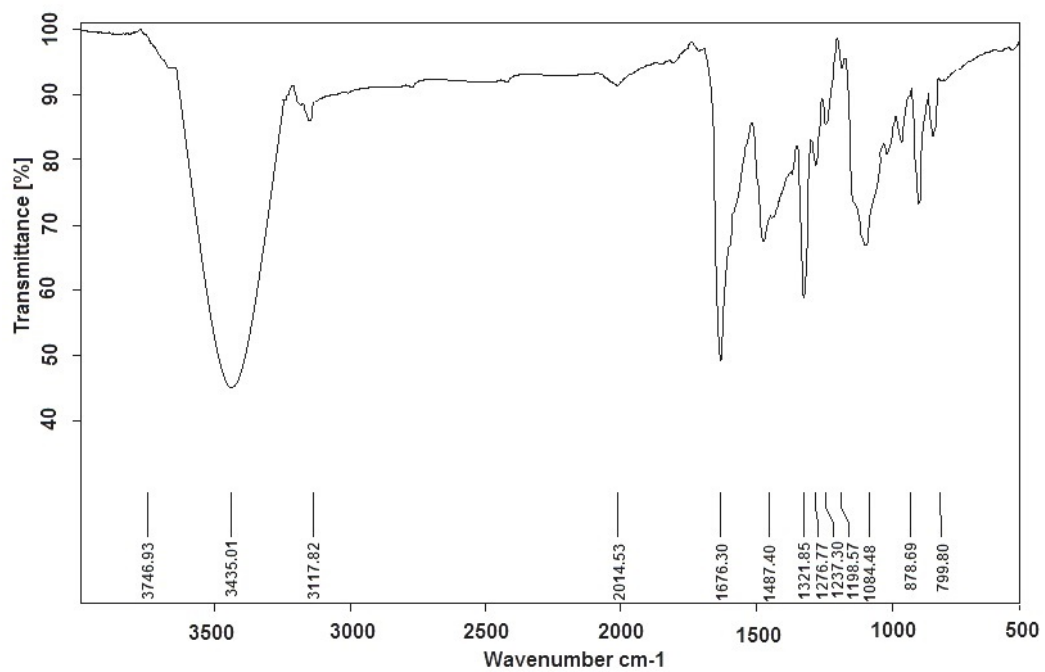

Figure S1

**Figure S1: IR spectrum of Diosmin**

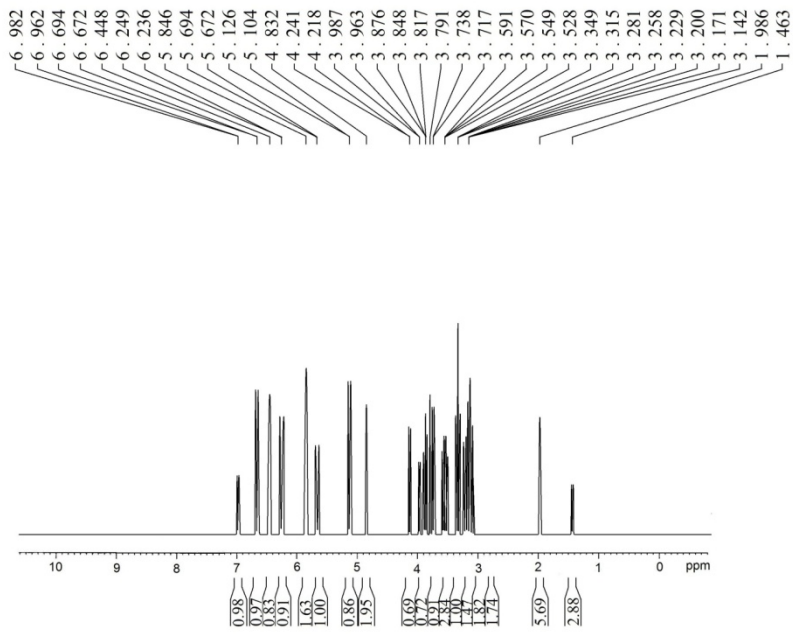

Figure S2

**Figure S2: <sup>1</sup>H NMR of Diosmin**

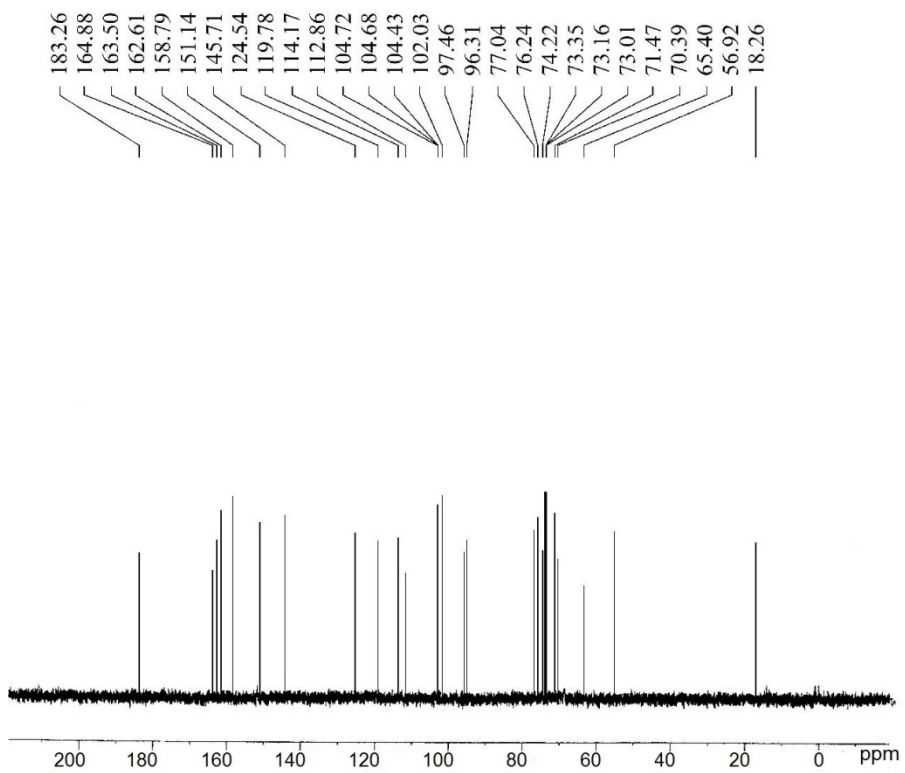

Figure S3

**Figure S3: <sup>13</sup>C NMR of Diosmin**
